# Supplementary figures and images for: An unprecedented 1D ladder coordination polymer based on a pentanuclear copper(ii) 2,4,6-tris(dipyridin-2-ylamino)-1,3,5-triazine building blockElectronic supplementary information (ESI) available: additional characterization data for 1 (µeff vs. T and B curves), TGA, XRD. See http://www.rsc.org/suppdata/cc/b2/b203394a/
Source: Royal Society of Chemistry journal article supplement (doi:10.1039/b203394a), 2002-06-11

SETARAM  
TAG24

Fig.: 04-01-02  
Sample: 101adderCu  
P: Setaram

Mass: 49.9 mg  
Ctr: Pt  
Atm: air

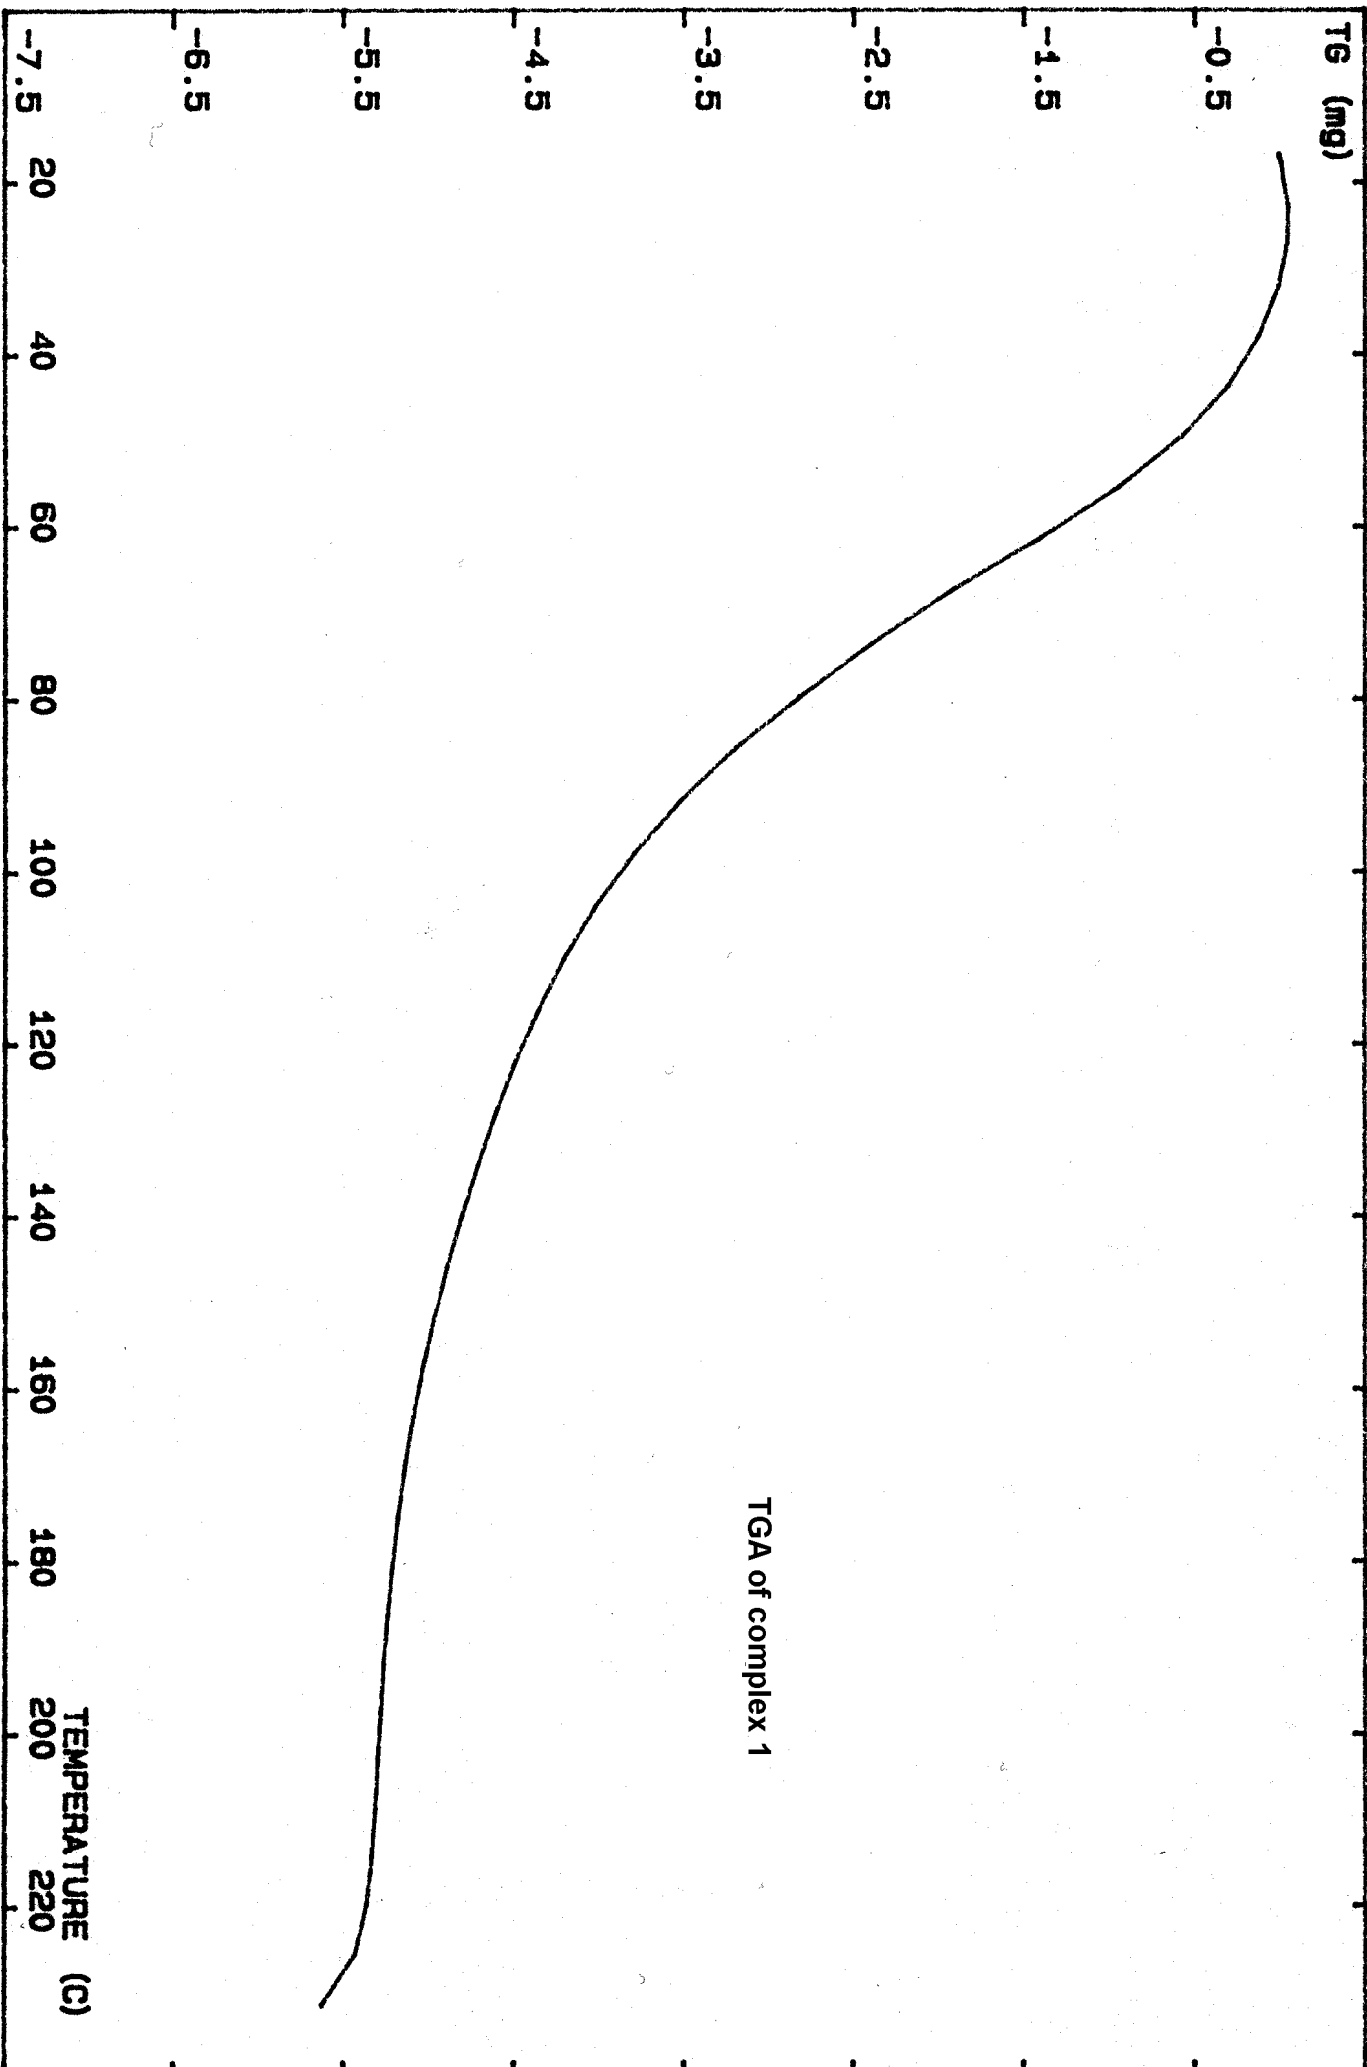

Supplement: b203394a2.pdf [file b203394a2.pdf]

Simulated XRD pattern for 1  
XRD pattern after removal of acetonitrile molecules

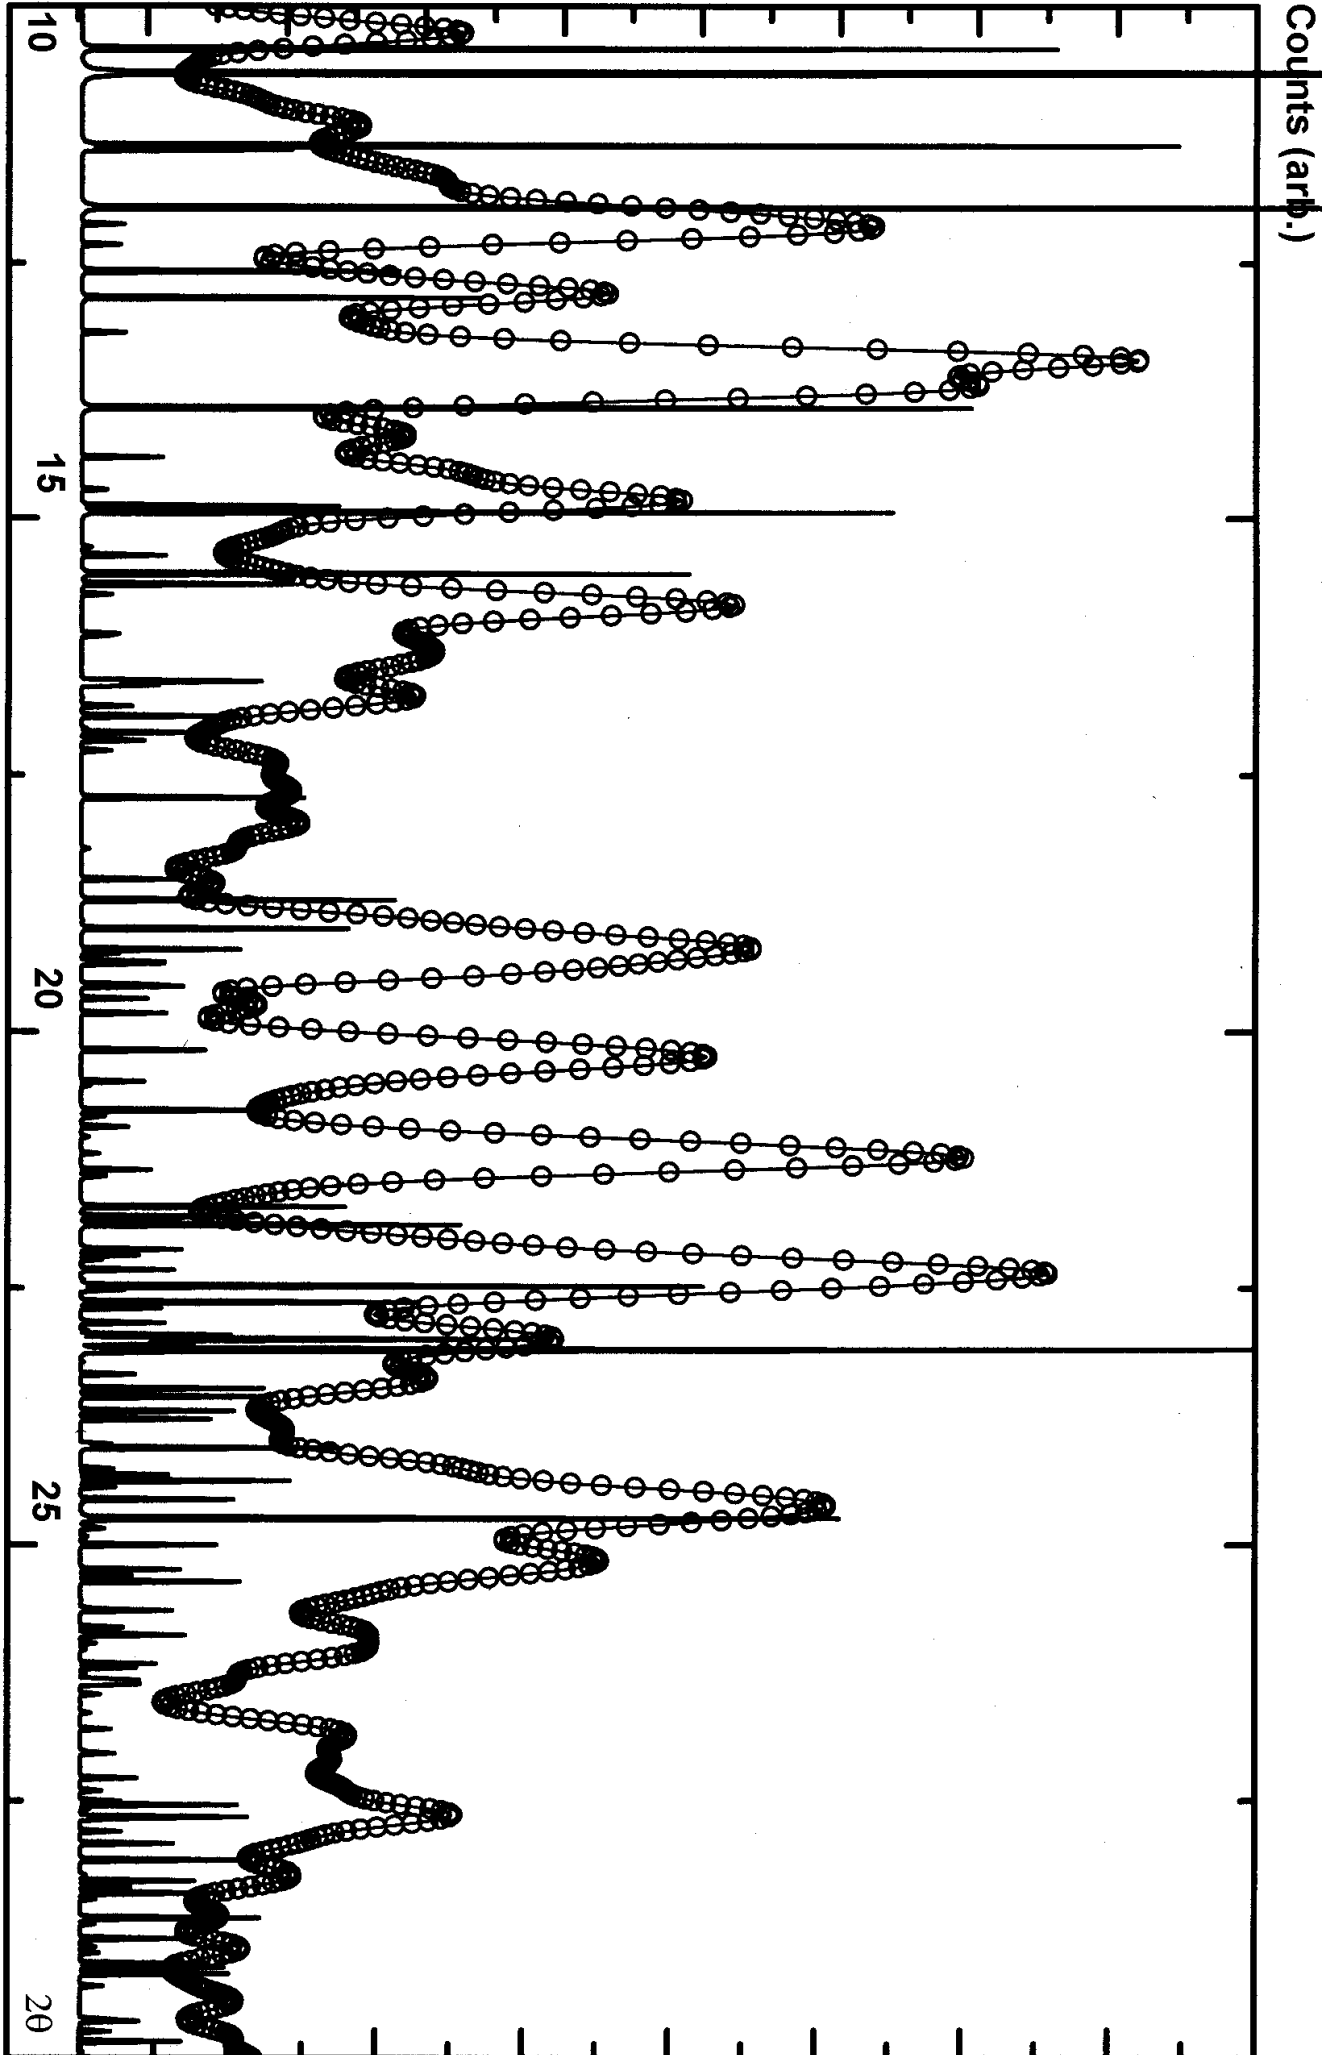

Supplement: b203394a4.pdf [file b203394a4.pdf]
